## 19 **Abstract**

### 20 **Background**

21 Pneumonia remains a public health challenge in most parts of the world, with Nigeria having the  
22 highest number of pneumonia-related deaths. Understanding the geographical distribution, trends and  
23 risk factors associated with pneumonia symptoms will aid an appropriate intervention of pneumonia  
24 and subsequently reduce its burden in Nigeria.

### 25 **Method**

26 This cross-sectional study used data from the 2008, 2013 and 2018 Nigeria Demographic Health  
27 Survey. In each of the survey round, a multi-stage cluster sampling technique was used to select the  
28 eligible respondents who are women of reproductive age. The outcome variables are the presence of  
29 key symptoms of pneumonia: fever, cough, and short rapid breaths. Optimized hotspot analysis was  
30 used to identify states with a significantly high prevalence of pneumonia symptoms, MCMC mixed-  
31 effect models were fitted to each symptom.

### 32 **Results**

33 The prevalence of cough was 12.1%, 10.1% and 16.9% in 2008, 2013 and 2018 respectively, 16.2%,  
34 13.3%, and 25.7% for fever; and 41.7%, 42.5% and 6.5% for short rapid breaths respectively with  
35 variations across the states. The adjusted odds of having a cough among the children aged 6-11, 12-  
36 23, 24-35 and 36-47 months were 95% higher (adjusted odds ratio (aOR) =1.95, 95% Credible Interval  
37 (CrI): 1.77, 2.18), 92% higher (aOR=1.92, 95% CrI: 1.73, 2.12), 45% higher (aOR=1.45, 95% CrI:  
38 1.31, 1.62) and 15% higher (aOR=1.15, 95% CrI: 1.03, 1.27) respectively, relative to ages 0-5 months.  
39 Similar patterns were noticed for fever and short rapid breaths. Mothers' education was significant for

40 cough and fever but not for short rapid breaths. Mothers' age was significant only for short rapid  
41 breaths at higher odds. Other significantly associated factors with symptoms include residence type,  
42 housing quality, wealth index and region.

## 43 **Conclusion**

44 Fever, cough, and short rapid Breaths are prevalent among under-five children in Nigeria. These  
45 symptoms are associated with different characteristics and varied across states in Nigeria. Therefore,  
46 it is pertinent that mothers improve on the available preventive and management strategies with the  
47 view to mitigating the consequences of pneumonia symptoms among under-five children in Nigeria.

48 Keywords: Pneumonia symptoms; Under-five children; Cough; Fever; Short Rapid Breadth; Nigeria

49

## 50 **Introduction**

51 Pneumonia is an acute respiratory infection in one or both lungs, characterized by cough, fever,  
52 shortness of breath, shallow breathing, low energy, etc. [1]. On an annual basis, the disease has  
53 accounted for over ten million hospital admissions and more than a million deaths among under-five  
54 children globally [2,3]. In 2017, pneumonia was identified as the 4<sup>th</sup> leading cause of mortality and  
55 may eventually become the 3<sup>rd</sup> by 2024 [4]. According to the World Health Organization (WHO),  
56 pneumonia accounts for about 14% of the disease burden globally [2].

57 In Africa, pneumonia is a potentially life-threatening ailment [2,5,6]. It is not just a major causal  
58 factor of mortality and morbidity, but it is as well associated with a non-negligible burden on healthcare  
59 infrastructures [7,8] and incomes of households [9]. Oftentimes, pneumonia involves several pathogens  
60 that are transmissible among individuals. Analyses have identified various pneumonia results to be

61 temporally seasonal [10,11]. Paynter et al. found that admissions based on pneumonia are clustered  
62 spatially on a high level aided by contact with infected individuals [12].

63 WHO estimated 868,000 deaths as a result of pneumonia in 2010 with 140,000 deaths on an  
64 annual basis among under-five children, the highest in Africa [13]. In Nigeria, pneumonia is one of the  
65 leading communicable diseases. Nigeria is one of the countries with the highest burden of pneumonia  
66 in childhood and accounts for 162,000 pneumonia-related deaths worldwide in 2018, constituting  
67 20.2% of global deaths [14]. The prevalence of pneumonia in a study conducted in Nigeria in 2013  
68 was 13.3% and 23.9% in another study in 2015 [15,16]. This high prevalence may attract poor health  
69 outcomes within the population if unchecked. Therefore, it is of utmost importance to abate the  
70 prevalence of pneumonia symptoms in Nigeria to ensure not just healthy living in children but for the  
71 future national sustainability as emphasized in the Sustainable Development Goal (SDG)-3, to “Ensure  
72 healthy lives and promote well-being for all and sundry and to bring to an end, avoidable deaths of  
73 under-five children with all countries aiming to abate neonatal deaths to as low as 12 per 1 000 live  
74 births and under-5 deaths to as low as 25 per 1 000 live births’ by 2030” [17].

75 Several factors have been identified as risk factors for childhood pneumonia, ranging from  
76 indoor air pollution due to biomass, outdoor air pollution as a result of vehicular emission and many  
77 other factors [18,19]. Previous studies have also documented that the air intake from polluting fuel is  
78 an influential risk factor for acute respiratory infection among under-five children in developing  
79 countries [20–27].

80 Other studies have shown that some socioeconomic characteristics like maternal education,  
81 region of residence, and household wealth status are important precursors to the risk factors for  
82 pneumonia symptoms among children [28–33]. Moreover, studies have also demonstrated that rural-  
83 urban residence [34], maternal age at the child’s birth and the child’s birth order (Mishra, 2003) and

84 water and sanitation facilities [35] are other risk factors for child pneumonia. However, most of these  
85 studies focused on the actual disease but not the individual possible symptoms. Addressing issues  
86 around the symptoms is more beneficial to the population's health than the disease itself.

87 It is also important to note that most of these earlier studies used only descriptive and traditional  
88 frequentist approaches. Concurrent assessment of the geographical distribution, trends and risk factors  
89 associated with pneumonia symptoms remains a grey area for research in Nigeria. Understanding the  
90 spatial-temporal distribution, trends and risk factors associated with pneumonia symptoms will aid the  
91 prevention of pneumonia and subsequently reduce its prevalence and attendant burden. Therefore, this  
92 study employed a Markov Chain Monte Carlo Random Intercept Logistic Regression to identify and  
93 explain the risk factors associated with pneumonia symptoms (cough, fever and short rapid breaths).  
94 This study makes an original contribution to existing knowledge on pneumonia by providing  
95 information on spatial-temporal distribution and drivers of the symptoms of pneumonia among under-  
96 five children in Nigeria. Our study outcomes will aid public health efforts toward reducing the  
97 incidence of pneumonia in children.

98

## 99 **Methods**

### 100 **Study Area**

101 This study was conducted in Nigeria - a West African country with an estimated population of about  
102 215 million. Nigeria consists of six (6) geo-political zones (North-Central, North-East, North-West,  
103 South-East, South-South and South-West), which are further divided into 36 states and the Federal  
104 Capital Territory (FCT), where each state consists of a third-tier local government and wards.  
105 Temperature and humidity are fairly constant all-round year in the south, while the seasons vary  
106 considerably in the north. Nigeria's climate is relatively hot and is usually classified into two seasons,  
107 dry and wet. The dry season runs from November to March, whereas, the wet season begins in April  
108 and ends in October. These seasons come with the symptoms of pneumonia depending on individuals'  
109 susceptibility, adaptation, and body reactions to changes in environmental conditions.

### 110 **Data Collection**

111 The data used in this study were nationally representative and based on the Nigeria Demographic  
112 Health Survey (NDHS) conducted in 2008, 2013 and 2018. In the surveys, the unit of inquiry was  
113 women of reproductive age (15 to 49 years). They were asked questions regarding their reproductive  
114 health, births and children alongside other related topics. The sampling of the respondents during the  
115 survey was based on a 2-stage stratified cluster design (National Population Commission [Nigeria] and  
116 ICF International, 2014). Data were collected from all eligible women in selected households with the  
117 aid of a pretested questionnaire by trained interviewers. Data collected from women about their under-  
118 five children were specially processed to constitute the children's recode file which was utilized for  
119 analysis in this study. A detailed explanation of the field processes has been reported elsewhere [39–  
120 41]

## 121 **Derivation of Variables**

122 The outcome variables for this study are fever, cough, and short and rapid breaths as symptoms of  
123 pneumonia. Each outcome variable measures the presence of the symptoms as “yes” or “no” with value  
124 labels “1” or “0” respectively.

125 Based on existing literature, the explanatory variables were grouped into household, maternal and  
126 children characteristics. The maternal background characteristics are age, education, household wealth  
127 quintile, place of residence, and geopolitical zone. Children's characteristics include current age in  
128 months and sex. The household characteristics included cooking fuel (clean/unclean), drinking water  
129 source (improved or unimproved), housing material (improved or unimproved) and toilet facility  
130 (improved or unimproved). Clean fuel includes electricity, and liquefied natural gas/biogas and unclean  
131 fuel include wood, charcoal, kerosene, straw shrubs, animal dung and grass. The improved sources of  
132 drinking water include a protected well, borehole, bottled water and spring rainwater. The unimproved  
133 includes a spring tanker, unprotected well with drum, sachet water, surface water, and other sources.  
134 The housing material quality derivation was based on a composite score of the type of wall, floor and  
135 roof materials. If cement/carpet/rug/ceramic tiles/vinyl asphalt strips were used for the floor, the floor  
136 quality is coded 1 else it is coded 0. In the same vein, wall material quality is coded 1 is made of cement  
137 blocks/bricks else 0. If the roof material is made of calamine/cement roofing shingles/cement  
138 fibres/ceramic tiles/zinc, it is coded 1 else 0. Categories of the housing material were further aggregated  
139 and coded as poor (1), average (2) and good (3). For toilet facilities, it was coded as improved or  
140 unimproved depending on the type of toilet facility used.

## 141 **Data Analyses**

142 Descriptive statistics, Bayesian MCMC logistic regression and spatial analyses were used. The spatial  
143 variation of the prevalence of the symptoms of pneumonia was analysed using the Optimized Hotspot  
144 Analysis. It entails the creation of maps of statistically significant hot and cold spots using the Getis-  
145 Ord  $G_i^*$  statistic employing incident points or weighted features (points or polygons). It evaluates the  
146 characteristics of the input feature class to produce optimal results. Optimized Hotspot analysis uses  
147 the Getis-Ord  $G_i^*$  statistic using a fixed distance band in ArcGIS software [42].

148 The Bayesian MCMC logistic regression model is as specified below:

$$149 \quad y_{i,j,k} = \mathbf{x}'_{i,j,k}\boldsymbol{\beta} + v_{i,j} + v_i + \varepsilon_{i,j,k}$$

150 For  $k = 1 \dots n_{ij}$  level-1 units that are nested within  $j = 1 \dots n_i$  level-2 units that are in turn nested  
151 within  $i = 1 \dots n$  level-3 units.

152 where  $\mathbf{x}'_{i,j,k}$  is the covariate vector,  $\boldsymbol{\beta}$  are unknown regression parameters,  $v_i$  is the unknown random  
153 effect at level 3,  $v_{i,j}$  is the unknown random effect at level-2, and  $\varepsilon_{i,j,k}$  are the model residuals that  
154 follow a logistic distribution. The model is a random-intercept mixed-effect model. Level 1 is fixed  
155 and consists of fixed effect predictors while levels 2 and 3 are the random effect levels defined by the  
156 group-level variables. Level 2 group level is defined by the community groups/cluster group variable  
157 while the level 3 group is defined by the state group variable. No group-level predictor is involved as  
158 interest is more of the amount of variation contributed by the group-level variables. The absence of  
159 group-level predictors makes the model a random-intercept mixed model.

160 In fitting the MCMC model, parameters specified in the *brms* package in R included 4 chains, 4 cores,  
161 4 threads, 50,000 iterations and a thinning rate of 50. A weakly informative prior, derived from the  
162 sample was also used.

## 163 **Results**



164 **Distribution of Pneumonia Symptoms and the Demographic**  
 165 **Characteristics of the Children and their Mothers.**

166 **Distribution of Cough**

167 Table 1 shows the prevalence of cough between 2008 and 2013. The prevalence of cough is highest  
 168 in 2018 (16.9%) and lowest in 2013 (10.1%). Across the survey years, the prevalence of cough was  
 169 consistently highest among children aged 6 to 11 months and least among women with no formal  
 170 education where the prevalence was 9.9%, 7.6%, and 14.7% in 2008, 2013, and 2018 survey year  
 171 respectively.

172 **Table 1. Prevalence of Cough by Selected Demographic Characteristics, per Year**

|                              | <b>2008</b><br>(N=22139)<br>n (%) | <b>2013</b><br>(N=26076)<br>n (%) | <b>2018</b><br>(N=11375)<br>n (%) |
|------------------------------|-----------------------------------|-----------------------------------|-----------------------------------|
| <b>Total</b>                 | 2673 (12.1)                       | 2630 (10.1)                       | 1921 (16.9)                       |
| <b>Characteristics</b>       |                                   |                                   |                                   |
| <b>Sex of Child</b>          | <b>2.71</b>                       | <b>0.887</b>                      | <b>0.052</b>                      |
| Male                         | 1319 (11.7)                       | 1350 (10.3)                       | 968 (16.8)                        |
| Female                       | 1354 (12.4)                       | 1280 (9.9)                        | 953 (17.0)                        |
| <b>Child Age (In Months)</b> | <b>147.532*</b>                   | <b>268.016*</b>                   | <b>92.017*</b>                    |
| 0-5                          | 257 (9.7)                         | 205 (7.3)                         | 164 (13.6)                        |
| 6-11                         | 399 (15.5)                        | 429 (14.1)                        | 271 (22.0)                        |
| 12-23                        | 684 (15.3)                        | 763 (14.1)                        | 496 (20.8)                        |
| 24-35                        | 553 (13.4)                        | 513 (10.5)                        | 360 (16.5)                        |
| 36-47                        | 424 (9.7)                         | 407 (8.0)                         | 362 (16.6)                        |
| 48-59                        | 356 (9.0)                         | 313 (6.5)                         | 268 (12.3)                        |
| <b>Maternal Age</b>          | <b>11.237</b>                     | <b>19.614*</b>                    | <b>17.875*</b>                    |
| 15-19                        | 158 (13.4)                        | 140 (11.3)                        | 69 (15.3)                         |
| 20-24                        | 524 (12.3)                        | 566 (11.3)                        | 388 (19.2)                        |
| 25-29                        | 793 (12.5)                        | 718 (9.8)                         | 580 (17.9)                        |
| 30-34                        | 587 (12.3)                        | 589 (10.2)                        | 414 (15.6)                        |
| 35-39                        | 370 (11.2)                        | 383 (9.3)                         | 302 (15.6)                        |
| 40-44                        | 174 (11.0)                        | 166 (8.5)                         | 118 (15.2)                        |
| 45-49                        | 67 (9.7)                          | 68 (9.4)                          | 50 (17.0)                         |
| <b>Maternal Education</b>    | <b>99.797*</b>                    | <b>170.411*</b>                   | <b>29.459*</b>                    |
| No Education                 | 1063 (9.9)                        | 935 (7.6)                         | 646 (14.7)                        |
| Primary                      | 702 (13.5)                        | 622 (11.5)                        | 375 (19.8)                        |

|                                 |                 |                 |                |
|---------------------------------|-----------------|-----------------|----------------|
| Secondary                       | 765 (15.0)      | 888 (13.0)      | 725 (17.9)     |
| Higher                          | 143 (12.6)      | 185 (12.2)      | 175 (16.8)     |
| <b>Source of Drinking Water</b> | <b>0.008</b>    | <b>0.019</b>    | <b>1.283</b>   |
| Improved                        | 1372 (12.1)     | 1561 (10.1)     | 1153 (16.6)    |
| Unimproved                      | 1301 (12.1)     | 1069 (10.1)     | 768 (17.4)     |
| <b>Cooking Fuel Type</b>        | <b>23.816*</b>  | <b>1.991</b>    | <b>2.481</b>   |
| Clean                           | 466 (14.7)      | 451 (10.7)      | 361 (15.8)     |
| Unclean                         | 2207 (11.6)     | 2179 (10.0)     | 1560 (17.2)    |
| <b>Toilet Facility</b>          | <b>0.406</b>    | <b>0.441</b>    | <b>2.21</b>    |
| Improved                        | 1295 (12.2)     | 1268 (10.0)     | 1049 (17.4)    |
| Unimproved                      | 1378 (11.9)     | 1362 (10.2)     | 872 (16.3)     |
| <b>Housing Quality Material</b> | <b>30.726*</b>  | <b>5.101</b>    | <b>14.678</b>  |
| Poor                            | 1084 (10.8)     | 1087 (9.9)      | 539 (19.2)     |
| Average                         | 374 (12.2)      | 392 (9.4)       | 326 (16.7)     |
| Good                            | 1215 (13.4)     | 1151 (10.5)     | 1056 (16.0)    |
| <b>Place of Residence</b>       | <b>2.361</b>    | <b>8.192*</b>   | <b>0.701</b>   |
| Urban                           | 783 (12.6)      | 921 (10.9)      | 733 (16.5)     |
| Rural                           | 1890 (11.9)     | 1709 (9.7)      | 1188 (17.1)    |
| <b>Wealth Index</b>             | <b>36.247*</b>  | <b>29.890*</b>  | <b>13.817</b>  |
| Poorest                         | 596 (10.9)      | 498 (8.4)       | 434 (19.2)     |
| Poorer                          | 560 (10.7)      | 614 (10.1)      | 362 (15.9)     |
| Middle                          | 544 (12.6)      | 605 (11.3)      | 419 (16.7)     |
| Richer                          | 537 (13.8)      | 489 (10.1)      | 408 (17.2)     |
| Richest                         | 436 (13.6)      | 424 (11.0)      | 298 (15.3)     |
| <b>Region</b>                   | <b>567.619*</b> | <b>745.567*</b> | <b>337.491</b> |
| North Central                   | 353 (8.4)       | 324 (8.2)       | 307 (15.3)     |
| North East                      | 817 (15.5)      | 914 (16.7)      | 544 (26.7)     |
| North West                      | 346 (6.3)       | 362 (4.4)       | 304 (10.9)     |
| South East                      | 408 (20.5)      | 364 (15.5)      | 298 (18.6)     |
| South South                     | 477 (19.8)      | 449 (14.5)      | 310 (24.7)     |
| South West                      | 272 (9.7)       | 217 (7.4)       | 158 (9.5)      |

173 \*Chi-square values significant at 95% C.I.

174

175

## 176 Distribution of Fever

177 Table 2 also shows that the prevalence of fever dipped between 2008 and 2013, from 16.2% to 13.3%  
178 and rose to 25.8% in 2018. Across the survey years, the data show that children in the age group 12-  
179 23 months mostly experienced fever more than their counterparts in the other age group while the least  
180 prevalence was found among those aged 0 to 5 months. The data further depict that in each survey  
181 year, fever's prevalence was persistently higher in children living in households where their source of  
182 drinking water was unimproved and those who used unclean fuel. Urban residents also had a lower  
183 prevalence of fever in under-five children compared to the rural residents and this pattern was observed  
184 across the survey rounds.

185 **Table 2. Prevalence of Fever by Selected Demographic Characteristics of the Children, per**

### 186 Survey Year

|                              | <b>2008</b><br>(N=22164)<br>n (%) | <b>2013</b><br>(N=26116)<br>n (%) | <b>2018</b><br>(N=11374)<br>n (%) |
|------------------------------|-----------------------------------|-----------------------------------|-----------------------------------|
| <b>Total</b>                 | <b>3590 (16.2)</b>                | <b>3483 (13.3)</b>                | <b>2925 (25.8)</b>                |
| <b>Characteristics</b>       |                                   |                                   |                                   |
| <b>Sex of Child</b>          | <b>4.123*</b>                     | <b>2.792</b>                      | <b>0.111</b>                      |
| Male                         | 1880 (16.7)                       | 1803 (13.7)                       | 1473 (25.6)                       |
| Female                       | 1710 (15.7)                       | 1680 (13.0)                       | 1452 (25.9)                       |
| <b>Child Age (In Months)</b> | <b>236.131*</b>                   | <b>338.382*</b>                   | <b>149.025*</b>                   |
| 0-5                          | 247 (9.3)                         | 212 (7.5)                         | 177 (14.7)                        |
| 6-11                         | 514 (19.9)                        | 541 (17.8)                        | 372 (30.2)                        |
| 12-23                        | 938 (20.9)                        | 996 (18.4)                        | 757 (31.8)                        |
| 24-35                        | 743 (18.0)                        | 702 (14.3)                        | 582 (26.6)                        |
| 36-47                        | 625 (14.3)                        | 575 (11.3)                        | 547 (25.0)                        |
| 48-59                        | 523 (13.3)                        | 457 (9.5)                         | 490 (22.4)                        |
| <b>Maternal Age</b>          | <b>10.013</b>                     | <b>8.509</b>                      | <b>9.537</b>                      |
| 15-19                        | 221 (18.7)                        | 180 (14.5)                        | 127 (28.2)                        |
| 20-24                        | 701 (16.5)                        | 699 (14.0)                        | 561 (27.8)                        |
| 25-29                        | 981 (15.4)                        | 985 (13.5)                        | 809 (24.9)                        |
| 30-34                        | 759 (15.9)                        | 739 (12.8)                        | 652 (24.5)                        |
| 35-39                        | 547 (16.6)                        | 513 (12.5)                        | 504 (26.0)                        |
| 40-44                        | 262 (16.5)                        | 261 (13.4)                        | 201 (26.0)                        |
| 45-49                        | 119 (17.1)                        | 106 (14.6)                        | 71 (24.1)                         |

|                                 |                 |                 |                 |
|---------------------------------|-----------------|-----------------|-----------------|
| <b>Maternal Education</b>       | <b>3.41</b>     | <b>5.552</b>    | <b>156.361*</b> |
| No Education                    | 1747 (16.3)     | 1659 (13.4)     | 1379 (31.4)     |
| Primary                         | 859 (16.5)      | 749 (13.9)      | 503 (26.6)      |
| Secondary                       | 822 (16.1)      | 899 (13.2)      | 864 (21.3)      |
| Higher                          | 162 (14.3)      | 176 (11.6)      | 179 (17.1)      |
| <b>Source of Drinking Water</b> | <b>19.767*</b>  | <b>4.590*</b>   | <b>10.145*</b>  |
| Improved                        | 1717 (15.1)     | 2004 (13.0)     | 1717 (24.7)     |
| Unimproved                      | 1873 (17.3)     | 1479 (13.9)     | 1208 (27.4)     |
| <b>Cooking Fuel Type</b>        | <b>7.640*</b>   | <b>65.805*</b>  | <b>151.739*</b> |
| Clean                           | 461 (14.5)      | 399 (9.5)       | 358 (15.7)      |
| Unclean                         | 3129 (16.5)     | 3084 (14.1)     | 2567 (28.2)     |
| <b>Toilet Facility</b>          | <b>6.048*</b>   | <b>0.778</b>    | <b>55.942*</b>  |
| Improved                        | 1651 (15.6)     | 1677 (13.1)     | 1378 (22.8)     |
| Unimproved                      | 1939 (16.8)     | 1806 (13.5)     | 1547 (29.0)     |
| <b>Housing Quality Material</b> | <b>16.895*</b>  | <b>56.614*</b>  | <b>197.277*</b> |
| Poor                            | 1737 (17.3)     | 1671 (15.2)     | 946 (33.7)      |
| Average                         | 477 (15.5)      | 512 (12.3)      | 596 (30.6)      |
| Good                            | 1376 (15.2)     | 1300 (11.9)     | 1383 (20.9)     |
| <b>Place of Residence</b>       | <b>42.322*</b>  | <b>4.232*</b>   | <b>86.975*</b>  |
| Urban                           | 847 (13.6)      | 1080 (12.7)     | 929 (20.9)      |
| Rural                           | 2743 (17.2)     | 2403 (13.6)     | 1996 (28.8)     |
| <b>Wealth Index</b>             | <b>31.415*</b>  | <b>64.975*</b>  | <b>261.618*</b> |
| Poorest                         | 957 (17.4)      | 861 (14.5)      | 811 (35.8)      |
| Poorer                          | 886 (16.9)      | 883 (14.5)      | 668 (29.4)      |
| Middle                          | 721 (16.6)      | 773 (14.4)      | 634 (25.2)      |
| Richer                          | 603 (15.5)      | 580 (11.9)      | 503 (21.2)      |
| Richest                         | 423 (13.2)      | 386 (10.0)      | 309 (15.8)      |
| <b>Region</b>                   | <b>487.378*</b> | <b>740.839*</b> | <b>380.292*</b> |
| North Central                   | 396 (9.4)       | 300 (7.6)       | 412 (20.5)      |
| North East                      | 1079 (20.5)     | 1205 (22.0)     | 737 (36.1)      |
| North West                      | 847 (15.4)      | 848 (10.2)      | 885 (31.7)      |
| South East                      | 514 (25.8)      | 479 (20.4)      | 371 (23.1)      |
| South South                     | 498 (20.7)      | 442 (14.3)      | 329 (26.2)      |
| South West                      | 256 (9.2)       | 209 (7.1)       | 191 (11.4)      |

187 \*Chi-square value significant at 95% C.I.

188

189

## 190 **Distribution of Short Rapid Breaths**

191 The prevalence of short rapid breath (SRB) among under-five children across the three survey rounds  
 192 was presented in Table 3. The prevalence of SRB was highest in 2008 (41.7%) and least in 2018 (6.5%).  
 193 There was a consistently high prevalence of SRB among under-five children living in households  
 194 where unimproved sources of drinking water were used – the prevalence of SRB were 47.3%, 48.9%,  
 195 and 7.4% in 2003, 2013, and 2018 respectively compared to households with improved sources of  
 196 drinking water. SRB prevalence in under-five children was consistently higher in rural areas than in  
 197 urban. In 2008 and 2013 data for instance, compared to under-five children living in the urban areas  
 198 where the prevalence of SRB was 36.1% and 32.9%, about 44.0% and 47.6% were found in the rural  
 199 areas respectively.

200  
 201 **Table 3. Prevalence of Short Rapid Breaths by Selected Demographic Characteristics, per Year**

|                               | <b>2008</b><br>(N=2620)<br>n (%) | <b>2013</b><br>(N=2605)<br>n (%) | <b>2018</b><br>(N=11376)<br>n (%) |
|-------------------------------|----------------------------------|----------------------------------|-----------------------------------|
| <b>Total</b>                  | <b>1092 (41.7)</b>               | <b>1106 (42.5)</b>               | <b>741 (6.5)</b>                  |
| <b><u>Characteristics</u></b> |                                  |                                  |                                   |
| <b>Sex of Child</b>           | <b>0.042</b>                     | <b>0.06</b>                      | <b>0.858</b>                      |
| Male                          | 544 (41.9)                       | 572 (42.7)                       | 363 (6.3)                         |
| Female                        | 548 (41.5)                       | 534 (42.2)                       | 378 (6.7)                         |
| <b>Child Age (In Months)</b>  | <b>7.212</b>                     | <b>12.832*</b>                   | <b>55.812*</b>                    |
| 0-5                           | 107 (42.5)                       | 86 (42.2)                        | 67 (5.6)                          |
| 6-11                          | 165 (42.3)                       | 190 (44.7)                       | 107 (8.7)                         |
| 12-23                         | 299 (44.6)                       | 334 (44.3)                       | 206 (8.6)                         |
| 24-35                         | 202 (37.2)                       | 233 (45.6)                       | 138 (6.3)                         |
| 36-47                         | 177 (42.4)                       | 147 (36.4)                       | 140 (6.4)                         |
| 48-59                         | 142 (40.8)                       | 116 (37.8)                       | 83 (3.8)                          |
| <b>Maternal Age</b>           | <b>20.680*</b>                   | <b>19.719*</b>                   | <b>7.356</b>                      |
| 15-19                         | 72 (47.4)                        | 63 (45.3)                        | 28 (6.2)                          |
| 20-24                         | 254 (49.1)                       | 267 (47.7)                       | 156 (7.7)                         |
| 25-29                         | 315 (40.8)                       | 290 (41.0)                       | 212 (6.5)                         |
| 30-34                         | 216 (37.4)                       | 230 (39.2)                       | 169 (6.4)                         |
| 35-39                         | 138 (38.0)                       | 141 (37.2)                       | 113 (5.8)                         |
| 40-44                         | 69 (40.1)                        | 78 (47.3)                        | 47 (6.1)                          |

|                                 |                 |                 |                 |
|---------------------------------|-----------------|-----------------|-----------------|
| 45-49                           | 28 (42.4)       | 37 (54.4)       | 16 (5.4)        |
| <b>Maternal Education</b>       | <b>129.945*</b> | <b>91.417*</b>  | <b>22.122*</b>  |
| No Education                    | 558 (54.0)      | 495 (53.4)      | 311 (7.1)       |
| Primary                         | 272 (39.4)      | 265 (43.3)      | 153 (8.1)       |
| Secondary                       | 235 (31.2)      | 295 (33.5)      | 231 (5.7)       |
| Higher                          | 27 (19.0)       | 51 (27.6)       | 46 (4.4)        |
| <b>Source of Drinking Water</b> | <b>32.737*</b>  | <b>29.953*</b>  | <b>10.361*</b>  |
| Improved                        | 488 (36.3)      | 589 (38.1)      | 412 (5.9)       |
| Unimproved                      | 604 (47.3)      | 517 (48.9)      | 329 (7.4)       |
| <b>Cooking Fuel Type</b>        | <b>77.870*</b>  | <b>113.769*</b> | <b>28.153*</b>  |
| Clean                           | 107 (23.3)      | 89 (19.8)       | 93 (4.1)        |
| Unclean                         | 985 (45.6)      | 1017 (47.2)     | 648 (7.1)       |
| <b>Toilet Facility</b>          | <b>17.827*</b>  | <b>15.629*</b>  | <b>0.723</b>    |
| Improved                        | 474 (37.5)      | 483 (38.5)      | 382 (6.3)       |
| Unimproved                      | 618 (45.6)      | 623 (46.1)      | 359 (6.7)       |
| <b>Housing Quality Material</b> | <b>123.180*</b> | <b>111.767*</b> | <b>56.336*</b>  |
| Poor                            | 560 (52.6)      | 557 (51.8)      | 255 (9.1)       |
| Average                         | 173 (47.5)      | 196 (50.8)      | 149 (7.6)       |
| Good                            | 359 (30.1)      | 353 (30.9)      | 337 (5.1)       |
| <b>Place of Residence</b>       | <b>13.815*</b>  | <b>52.518*</b>  | <b>13.447*</b>  |
| Urban                           | 277 (36.1)      | 300 (32.9)      | 242 (5.5)       |
| Rural                           | 815 (44.0)      | 806 (47.6)      | 499 (7.2)       |
| <b>Wealth Index</b>             | <b>141.450*</b> | <b>143.625*</b> | <b>57.612*</b>  |
| Poorest                         | 305 (52.2)      | 263 (53.0)      | 218 (9.6)       |
| Poorer                          | 296 (54.0)      | 321 (53.1)      | 150 (6.6)       |
| Middle                          | 226 (42.5)      | 276 (46.1)      | 163 (6.5)       |
| Richer                          | 160 (30.5)      | 144 (29.6)      | 127 (5.4)       |
| Richest                         | 105 (24.4)      | 102 (24.3)      | 83 (4.2)        |
| <b>Region</b>                   | <b>228.194*</b> | <b>270.902*</b> | <b>421.444*</b> |
| North Central                   | 143 (41.4)      | 149 (46.6)      | 78 (3.9)        |
| North East                      | 469 (58.7)      | 553 (61.2)      | 323 (15.8)      |
| North West                      | 176 (52.9)      | 128 (35.9)      | 104 (3.7)       |
| South East                      | 112 (27.7)      | 132 (36.5)      | 102 (6.4)       |
| South South                     | 141 (30.0)      | 117 (26.2)      | 106 (8.4)       |
| South West                      | 51 (19.0)       | 27 (12.5)       | 28 (1.7)        |

202 \*Chi-square values significant at 95% C.I.

203

204

## 205 **Optimized Hotspot Analysis of Prevalence of Pneumonia Symptoms**

206 Figs 1-3 show the spatial and temporal distribution of states in Nigeria with a significantly high  
207 prevalence of pneumonia symptoms. For Cough, Fig 1 indicates a decrease in states with a significantly  
208 high prevalence of cough over time. In 2008, only Gombe has a significantly high prevalence at 90%  
209 CI while the other years has no states with significantly high prevalence. Fig 2 indicates an overall  
210 decrease in prevalence and states with a significantly high prevalence of fever over time. In 2008,  
211 Bayelsa, Rivers, Akwa Ibom, Edo, Anambra, Enugu, Ebonyi and Imo states had significantly high  
212 prevalence at 90% CI while in 2013, the south-south states had less significant prevalence which  
213 include Delta, Bayelsa and Rivers only at 90% CI. There was no state with a significantly high  
214 prevalence of fever in 2018. Fig 3 shows a decrease in the number of states with significantly high  
215 prevalence from 2008 to 2018. In 2008, Kaduna, Kano and Jigawa were the states with a significantly  
216 high prevalence of short rapid breath. In 2013 and 2018, only Yobe and Taraba has a significantly high  
217 prevalence of pneumonia symptoms respectively.

218 **Fig 1. Significance of High Prevalence of Cough in under-five children in Nigeria, 2008-2018**

219

220 **Fig 2. Significance of High Prevalence of Fever in under-five children in Nigeria, 2008-2018**

221

222 **Fig 3. Significance of High Prevalence of Short, Rapid Breaths in under-five children in**  
223 **Nigeria, 2008-2018**

224

225

## 226 **Factors Associated with Cough, Fever and Short Rapid Breath**

227 Table 4 presents the results of the adjusted MCMC models fitted for each of the symptoms. It is worthy  
 228 of note that the factors included in these models were put through bivariate analysis to determine their  
 229 independent association with the respective symptoms before they were seeded into the multiple  
 230 models. The adjusted odds of cough reduced by 20% (adjusted odds ratio (aOR) =0.80, 95% Credible  
 231 Interval (CrI): 0.76-0.85) in 2013 but rose by 52% (aOR =1.52, 95% CrI: 1.40, 1.63) in 2018 compared  
 232 with the likelihood in 2008. Similarly, the adjusted odds of fever reduced by 24% (aOR =0.76, 95%  
 233 CrI: 0.72, 0.80) in 2013 and nearly doubled (aOR =1.93, 95% CrI: 1.82, 2.05) in 2018. Whereas the  
 234 adjusted odds of short rapid breaths were insignificant in 2013, but reduced by 91% (aOR =0.09, 95%  
 235 CrI: 0.08, 0.11) in 2018 compared with 2008.

236 **Table 4 Results of the Monte Carlo Markov Chain Models for each Symptom of Pneumonia.**

|                             |        | Cough                 | Fever                 | Short, Rapid Breaths  |
|-----------------------------|--------|-----------------------|-----------------------|-----------------------|
|                             |        | Adjusted OR (95% CrI) | Adjusted OR (95% CrI) | Adjusted OR (95% CrI) |
| <b>Variables</b>            |        |                       |                       |                       |
| <b>Year</b>                 |        |                       |                       |                       |
|                             | 2008   | Reference             |                       |                       |
|                             | 2013   | 0.80(0.76-0.85)*      | 0.76(0.72-0.80)*      | 0.96(0.84-1.11)       |
|                             | 2018   | 1.52(1.40-1.63)*      | 1.93(1.82-2.05)*      | 0.09(0.08-0.11)*      |
| <b>Sex of Child</b>         |        |                       |                       |                       |
|                             | Male   | Reference             |                       |                       |
|                             | Female | 1.02(0.96-1.07)       | 0.94(0.90-0.99)*      | 1.01(0.91-1.11)       |
| <b>Child Age (months)</b>   |        |                       |                       |                       |
|                             | 0-5    | Reference             |                       |                       |
|                             | 6-11   | 1.95(1.77-2.18)*      | 2.66(2.44-2.97)*      | 1.35(1.11-1.67)*      |
|                             | 12-23  | 1.92(1.73-2.12)*      | 2.86(2.61-3.16)*      | 1.34(1.12-1.63)*      |
|                             | 24-35  | 1.45(1.31-1.62)*      | 2.23(2.01-2.44)*      | 1.11(0.90-1.34)       |
|                             | 36-47  | 1.15(1.03-1.27)*      | 1.75(1.58-1.93)*      | 1.00(0.82-1.22)       |
|                             | 48-59  | 0.93(0.84-1.04)       | 1.51(1.36-1.67)*      | 0.79(0.64-0.98)*      |
| <b>Mother's Age (years)</b> |        |                       |                       |                       |
|                             | 15-19  | Reference             |                       |                       |
|                             | 20-24  | 1.11(0.98-1.27)       | 1.04(0.93-1.16)       | 1.42(1.12-1.80)*      |
|                             | 25-29  | 1.02(0.90-1.15)       | 1.01(0.90-1.13)       | 1.16(0.92-1.46)       |
|                             | 30-34  | 1.00(0.88-1.15)       | 1.02(0.91-1.15)       | 1.15(0.91-1.46)       |
|                             | 35-39  | 0.95(0.84-1.08)       | 1.03(0.92-1.16)       | 1.05(0.82-1.36)       |
|                             | 40-44  | 0.95(0.82-1.11)       | 1.07(0.93-1.22)       | 1.25(0.93-1.65)       |
|                             | 45-49  | 1.06(0.87-1.30)       | 1.08(0.90-1.28)       | 1.19(0.82-1.72)       |



### Mother's Education

|              |                  |                  |                 |
|--------------|------------------|------------------|-----------------|
| No Education | Reference        |                  |                 |
| Primary      | 1.39(1.28-1.52)* | 1.13(1.05-1.22)* | 1.13(0.98-1.31) |
| Secondary    | 1.35(1.23-1.48)* | 1.08(1.00-1.17)  | 1.01(0.87-1.20) |
| Higher       | 1.32(1.15-1.51)* | 1.06(0.94-1.21)  | 0.93(0.71-1.22) |

### Source of Drinking Water

|            |                 |                 |                 |
|------------|-----------------|-----------------|-----------------|
| Improved   | Reference       |                 |                 |
| Unimproved | 0.99(0.92-1.06) | 0.99(0.94-1.05) | 1.06(0.95-1.20) |

### Cooking Fuel Type

|         |                 |                 |                 |
|---------|-----------------|-----------------|-----------------|
| Clean   | Reference       |                 |                 |
| Unclean | 0.90(0.80-1.00) | 0.95(0.86-1.06) | 1.12(0.90-1.40) |

### Toilet Type

|            |                 |                 |                 |
|------------|-----------------|-----------------|-----------------|
| Improved   | Reference       |                 |                 |
| Unimproved | 0.98(0.91-1.04) | 1.02(0.96-1.08) | 0.99(0.88-1.13) |

### Housing Material Quality

|         |                  |                 |                  |
|---------|------------------|-----------------|------------------|
| Poor    | Reference        |                 |                  |
| Average | 0.99(0.90-1.08)  | 0.97(0.90-1.05) | 0.98(0.82-1.16)  |
| Good    | 0.89(0.80-0.99)* | 1.01(0.92-1.11) | 0.76(0.62-0.92)* |

### Type of Place of Residence

|       |                 |                  |                 |
|-------|-----------------|------------------|-----------------|
| Urban | Reference       |                  |                 |
| Rural | 1.03(0.95-1.12) | 1.13(1.05-1.21)* | 0.98(0.84-1.14) |

### Wealth Index

|         |                  |                  |                 |
|---------|------------------|------------------|-----------------|
| Poorest | Reference        |                  |                 |
| Poorer  | 1.06(0.97-1.16)  | 1.04(0.97-1.13)  | 1.12(0.94-1.31) |
| Middle  | 1.14(1.01-1.30)* | 1.03(0.93-1.15)  | 1.14(0.91-1.42) |
| Richer  | 1.14(0.99-1.31)  | 0.93(0.82-1.06)  | 0.90(0.68-1.19) |
| Richest | 1.09(0.91-1.31)  | 0.80(0.68-0.95)* | 0.92(0.66-1.28) |

### Region

|               |                  |                  |                  |
|---------------|------------------|------------------|------------------|
| North Central | Reference        |                  |                  |
| North East    | 2.64(1.62-4.10)* | 2.80(1.80-4.53)* | 3.16(2.12-4.81)* |
| North West    | 0.76(0.49-1.22)  | 1.63(1.06-2.51)* | 1.05(0.70-1.62)  |
| South East    | 1.93(1.17-3.16)* | 2.20(1.35-3.53)* | 1.22(0.77-1.92)  |
| South South   | 1.97(1.25-3.19)* | 1.73(1.09-2.75)* | 1.13(0.73-1.77)  |
| South West    | 0.85(0.52-1.35)  | 0.83(0.51-1.31)  | 0.43(0.27-0.67)* |

### Random Effects (Intercepts)

#### Neighbourhood Level

|                                 |                         |                         |                          |
|---------------------------------|-------------------------|-------------------------|--------------------------|
| Variance (CrI 95%)              | <b>0.23(0.43-0.52)*</b> | <b>0.21(0.42-0.50)*</b> | <b>0.37(0.53-0.69)*</b>  |
| % Variation Explained (CrI 95%) | <b>0.06(0.03-0.10)*</b> | <b>0.04(0.02-0.07)*</b> | <b>0.03(-0.01-0.06)*</b> |

#### State Level

|                                 |                          |                          |                          |
|---------------------------------|--------------------------|--------------------------|--------------------------|
| Variance (CrI 95%)              | <b>0.17(0.31-0.55)*</b>  | <b>0.16(0.31-0.53)*</b>  | <b>0.10(0.22-0.47)*</b>  |
| % Variation Explained (CrI 95%) | <b>0.03(-0.09-0.14)*</b> | <b>0.03(-0.06-0.13)*</b> | <b>0.01(-0.06-0.08)*</b> |

237 **OR: Odds Ratio, CrI: Credible Interval**

238

## 239 Discussion

240 This study was designed to identify and explain the Spatio-temporal distribution and risk factors  
241 associated with pneumonia symptoms among under-five children in Nigeria using the Markov Chain  
242 Monte Carlo Random Intercept Logistic Regression. The study was conceptualized against the  
243 backdrop and gap observed in similar studies previously conducted in Nigeria. A temporal pattern was  
244 observed in the model. This corroborated the need for spatial analyses of the symptoms by survey  
245 years. The likelihood of cough and fever both reduced between 2008 and 2013 but the odds rose by  
246 52% and 93% respectively in 2018. In sharp contrast, the adjusted odds of short rapid breaths were  
247 reduced by 91% in 2018 compared with 2013. The temporal pattern observed in the current study  
248 corroborates findings from similar studies conducted elsewhere [43,44].

249 The in-depth spatial hotspot analysis indicated a significant reduction in the prevalence of the  
250 symptoms of pneumonia from 2008 to 2018. This decrease may not be unconnected with the various  
251 interventional programme and efforts of the government of Nigeria in conjunction with the United  
252 Nations and other international partners. For instance, the introduction of the National Pneumonia  
253 Control Strategy and Implementation Plan (NPCSIP) by the Nigerian government in the year 2019  
254 towards reducing the high number of childhood mortality due to pneumonia and the menace of  
255 pneumonia-related morbidities/deaths in under-five children [45] can explain the reason for our  
256 finding. The impact of the government' interventions may be responsible for the statistically significant  
257 reduction of these symptoms over the years. In our study, the gender of the child was found to be  
258 related to fever. Gender has been said to be a significant epidemiological factor for most diseases [46].  
259 It is important to note that the males also had a higher prevalence of fever as a symptom of pneumonia  
260 for all the years under study. Similarly, Victoria et al. found gender to be significantly related to  
261 pneumonia but was expressed as the males having a higher odds of experiencing pneumonia, though

262 the odds of a male having pneumonia than a female in this study was lower [47]. The role of sex  
263 hormones in the immunity of individuals may have been responsible for this difference [46].

264 Children aged 6 to 47 months had higher odds of experiencing cough, fever, or short rapid breaths as  
265 symptoms of pneumonia relative to 0 to 5 months children. Previous studies also reported that the odds  
266 of contracting pneumonia was higher among children aged 6 to 48 months and lower among children  
267 aged 48 to 59 months [31]. This confirms the assertion that younger age corresponds to higher odds of  
268 contracting pneumonia in children [7]. Maternal age was significant only for short rapid breaths in  
269 mothers aged 20 to 24 where they had higher odds of bringing about short rapid breaths as a pneumonia  
270 symptom in their children. This may be due to inexperience in child care or their lack of knowledge or  
271 perception of pneumonia. Another study that examined how age affects mothers' perception and  
272 knowledge of pneumonia in children found that women aged 18-24 were grossly lacking in knowledge  
273 [48]. This poor knowledge may have accounted for mothers aged 20-24 ability to prevent the  
274 occurrence of pneumonia (short rapid breaths) in under-five children. Maternal education goes to a  
275 large extent in affecting their knowledge of pneumonia and its preventive measures. It is expected  
276 higher education among mothers would correspond to lower odds of the occurrence of pneumonia  
277 symptoms in their children. However, this may not necessarily be the case, as there may be a difference  
278 between knowledge and practice, particularly regarding health outcomes [49].

279 The sources of drinking water were not found to be significant for the three symptoms of pneumonia  
280 in this study contrary to earlier findings [50,51] despite a large-scale lack of quality water in Nigeria  
281 [52,53]. Unclean cooking fuel was found not to be significantly associated with cough, fever, and  
282 short rapid breaths as symptoms of pneumonia. This is against the expectation of the effect of pollution  
283 caused by unclean solid fuels. The findings were corroborated in a study of the household environment  
284 and symptoms of childhood acute respiratory tract infections in Nigeria [54].

285 The role that housing plays in the state of the health of the people cannot be overlooked and  
286 overemphasized [55]. Homes that are healthy with enough quality ventilation and insulation guarantees  
287 the health of the members of such households, free from pests and contaminant [56]. Findings from  
288 this study showed that the odds of cough and short rapid breaths as symptoms of pneumonia were  
289 lower among children residing in buildings with good housing material quality. Overcrowding, poor  
290 sleeping arrangements, and poor ventilation dominate most housing with poor quality in Nigeria, but  
291 findings on toilet facility contrasts previous literature that sanitation and hygiene is a major  
292 contribution to childhood pneumonia [57]. A possible basis for the disparity in the odds of the  
293 symptoms across the geopolitical regions can be attributed to variations in social and economic  
294 development in these regions [54,58,59].

295

## 296 **Study Limitations and Strengths**

297 The use of secondary data for this study limits the choice of variables we explored. The data might  
298 have suffered recall bias as this study was a cross-sectional study wherein respondents were made to  
299 recall past events without any means of verification by the data collectors. Notwithstanding, the data  
300 collection procedures and methods adopted by DHS minimized the effect of such bias. The DHS is  
301 well-known for its high quality as a result of the data collection approach used by the data originators.  
302 The data used is also nationally representative data covering nearly two decades. Also, the pneumonia  
303 symptoms available in the DHS dataset are not exhaustive and prevented the measurement of  
304 pneumonia from a diagnostic perspective which would have enabled us to have a variable measuring  
305 pneumonia as a disease. A major strength of our study is the assessment of factors associated with  
306 individual symptoms compared to other studies that studied their composite. The use of Bayesian  
307 models in place of frequentist models in understanding the associated risk factors helped to avoid the  
308 problems of the inconsistency of results associated with the frequentist approach.

309

## 310 **Conclusion**

311 This study provided evidence that variations exist in the prevalence of pneumonia symptoms among  
312 under-five children across the states in Nigeria. The northern states were more characterized by *short,*  
313 *rapid breaths* while the southern states were more characterized by *fever* but both regions have a fair  
314 share of *cough* among under-five children.

315 For the cough and fever symptoms, the increased prevalence between 2013 and 2018 indicates that the  
316 symptoms need more attention. Although care should be taken in interpreting the significance of a  
317 factor to at least one of the symptoms of pneumonia as significance to pneumonia, our findings

318 supported positive change in pneumonia prevention by providing evidence of risk factors influencing  
319 the symptoms of pneumonia. Child's age and region of residence were significant determinants of all  
320 pneumonia symptoms considered in the study. While place of residence was a significant predictor of  
321 fever, wealth and mother's education was significant for cough and fever.

## 322 **Recommendations**

323 Government and other relevant stakeholders should do more in the area of providing good housing  
324 conditions to its population as this will alleviate the prevalence of pneumonia symptoms in Nigeria.  
325 The interventions for pneumonia control towards the United Nation's Millennium Development Goal  
326 (MDG) 4 of reducing child mortality by two-thirds should be sustained and improved upon since these  
327 strategies have yielded good results. Effective case management and treatment at the community level  
328 should be ensured. The high prevalence of pneumonia symptoms in Nigeria as evidenced in this study  
329 points to the need for government to improve on the existing sensitization frameworks on home  
330 prevention of pneumonia symptoms in under-five children in Nigeria.

331

## 332 **Declarations:**

### 333 **Ethics approval and consent to participate**

334 The owners of the secondary data used in this analysis obtained the necessary ethical approval and  
335 consent prior to data collection. There was no need for further approvals on our part as open-source  
336 secondary data.

### 337 **Competing interests**

338 The authors declared no conflict of interest

## 339 **Funding**

340 Authors received no funding for this study

## 341 **Authors' contributions**

342 AKA, LTV and FAF conceptualized and designed the study. AKA and LTV analyzed and interpreted  
343 the data while FAF and AAS were senior authors overseeing the analysis and interpretation of the  
344 results. AKA and LTV drafted the manuscript FAF and AAS reviewed and edited the manuscript. All  
345 authors have read and agreed to the published version of the manuscript.

## 346 **Acknowledgements**

347 The authors are grateful to ICF Macro, USA, for granting the authors the request to use the  
348 Demographic and Health Survey data.

349

## 350 **References**

- 351 1. WHO. Pneumonia: the forgotten killer of children. 2006.
- 352 2. WHO. World Health Statistics. 2019.
- 353 3. Nair H, Simões EAF, Rudan I, Gessner BD, Azziz-Baumgartner E, Zhang JSF, et al. Global  
354 and regional burden of hospital admissions for severe acute lower respiratory infections in  
355 young children in 2010: A systematic analysis. *Lancet*. 2013;381: 1380–1390.  
356 doi:10.1016/S0140-6736(12)61901-1
- 357 4. Institute of Health Metrics and Evaluation. Global Burden of Disease Study 2017. *Lancet*.  
358 2017;5: 1–27. Available:  
359 [http://www.healthdata.org/sites/default/files/files/policy\\_report/2019/GBD\\_2017\\_Booklet.pdf](http://www.healthdata.org/sites/default/files/files/policy_report/2019/GBD_2017_Booklet.pdf)
- 360 5. Franco J. Community-acquired Pneumonia. *Radiol Technol*. 2017;88: 621–636.
- 361 6. Di Pasquale MF, Sotgiu G, Gramegna A, Radovanovic D, Terraneo S, Reyes LF, et al.  
362 Prevalence and etiology of community-acquired pneumonia in immunocompromised patients.  
363 *Clin Infect Dis*. 2019;68: 1482–1493. doi:10.1093/cid/ciy723
- 364 7. Prina E, Ranzani OT, Torres A. Community-acquired pneumonia. *Lancet*. 2015;386: 1097–  
365 1108. doi:10.1016/S0140-6736(15)60733-4
- 366 8. Tan KK, Dang DA, Kim KH, Kartasasmita C, Kim HM, Zhang XH, et al. Burden of  
367 hospitalized childhood community-acquired pneumonia: A retrospective cross-sectional study  
368 in Vietnam, Malaysia, Indonesia and the Republic of Korea. *Hum Vaccines Immunother*.  
369 2018;14: 95–105. doi:10.1080/21645515.2017.1375073
- 370 9. Sabin LL, Estrella B, Sempértegui F, Farquhar N, Mesic A, Halim N, et al. Household costs



- 371 associated with hospitalization of children with severe pneumonia in Quito, Ecuador. *Am J*  
372 *Trop Med Hyg.* 2020;102: 731–739. doi:10.4269/ajtmh.19-0721
- 373 10. Nimbalkar PM, Tripathi NK. Space-time epidemiology and effect of meteorological  
374 parameters on influenza-like illness in Phitsanulok, a Northern Province in Thailand. *Geospat*  
375 *Health.* 2016;11: 274–282. doi:10.4081/gh.2016.447
- 376 11. Farrar DS, Awasthi S, Fadel SA, Kumar R, Sinha A, Fu SH, et al. Seasonal variation and  
377 etiologic inferences of childhood pneumonia and diarrhea mortality in India. *Elife.* 2019;8: 1–  
378 23. doi:10.7554/eLife.46202
- 379 12. Paynter S, Ware RS, Weinstein P, Williams G, Sly PD. Childhood pneumonia: A neglected,  
380 climate-sensitive disease? *Lancet.* 2010;376: 1804–1805. doi:10.1016/S0140-6736(10)62141-  
381 1
- 382 13. Liu L, Johnson HL, Cousens S, Perin J, Scott S, Lawn JE, et al. Global, regional, and national  
383 causes of child mortality: An updated systematic analysis for 2010 with time trends since  
384 2000. *Lancet.* 2012;379: 2151–2161. doi:10.1016/S0140-6736(12)60560-1
- 385 14. United Nations Children’s Fund (UNICEF). For every child, reimagine, UNICEF Annual  
386 Report. 2019. Available: [https://www.unicef.org/sites/default/files/2020-06/UNICEF-annual-](https://www.unicef.org/sites/default/files/2020-06/UNICEF-annual-report-2019_2.pdf)  
387 [report-2019\\_2.pdf](https://www.unicef.org/sites/default/files/2020-06/UNICEF-annual-report-2019_2.pdf)
- 388 15. Abdulkarim A, Ibraheem R, Adeboye M. Childhood pneumonia at the University of Ilorin  
389 Teaching Hospital, Ilorin Nigeria. *Niger J Paediatr.* 2013;40: 284-289–289.
- 390 16. Kuti B. Childhood Community - acquired Pneumonia at the Wesley Guild Hospital , Ilesa :  
391 Prevalence , Pattern , and Outcome Determinants. 2015; 98–104. doi:10.4103/1596-  
392 4078.182323

- 393 17. United Nations. The Sustainable Development Goals Report. 2017; 60.
- 394 18. WHO. World health statistics 2018: monitoring health for the SDGs, sustainable development  
395 goals. 2018. Available: [http://link.springer.com/10.1007/978-3-319-76887-](http://link.springer.com/10.1007/978-3-319-76887-8)  
396 [8%0Ahttp://link.springer.com/10.1007/978-3-319-93594-](http://link.springer.com/10.1007/978-3-319-93594-2)  
397 [2%0Ahttp://dx.doi.org/10.1016/B978-0-12-409517-5.00007-](http://dx.doi.org/10.1016/B978-0-12-409517-5.00007-3)  
398 [3%0Ahttp://dx.doi.org/10.1016/j.jff.2015.06.018](http://dx.doi.org/10.1016/j.jff.2015.06.018)[%0Ahttp://dx.doi.org/10.1038/s41559-019-](http://dx.doi.org/10.1038/s41559-019-0877-3)  
399 [0877-3%0Aht](http://dx.doi.org/10.1038/s41559-019-0877-3)
- 400 19. Smith KR, Pillarisetti A. Household Air Pollution from Solid Cookfuels and Its Effects on  
401 Health. *Dis Control Priorities, Third Ed (Volume 7) Inj Prev Environ Heal*. 2017; 133–152.  
402 doi:10.1596/978-1-4648-0522-6\_ch7
- 403 20. Mishra V. Indoor air pollution from biomass combustion and acute respiratory illness in  
404 preschool age children in Zimbabwe. *Int J Epidemiol*. 2003;32: 847–853.  
405 doi:10.1093/ije/dyg240
- 406 21. Mishra V, Smith KR, Retherford RD. Effects of Cooking Smoke and Environmental Tobacco  
407 Smoke on Acute Respiratory Infections in Young Indian Children. *Popul Environ*. 2005;26:  
408 375–396. Available: <http://www.jstor.org/stable/27503934>
- 409 22. Wichmann J, Voyi KV V. Impact of cooking and heating fuel use on acute respiratory health  
410 of preschool children in South Africa. *South African J Epidemiol Infect*. 2006;21: 48–54.  
411 doi:10.1080/10158782.2006.11441264
- 412 23. Kilabuko JH, Nakai S. Effects of cooking fuels on acute respiratory infections in children in  
413 Tanzania. *Int J Environ Res Public Health*. 2007;4: 283–288.  
414 doi:10.3390/ijerph200704040003

- 415 24. Sanbata H, Asfaw A, Kumie A. Association of biomass fuel use with acute respiratory  
416 infections among under- five children in a slum urban of Addis Ababa, Ethiopia. BMC Public  
417 Health. 2014;14: 1–8. doi:10.1186/1471-2458-14-1122
- 418 25. Buchner H, Rehfuess EA. Cooking and season as risk factors for acute lower respiratory  
419 infections in African children: A cross-sectional multi-country analysis. PLoS One. 2015;10:  
420 1–21. doi:10.1371/journal.pone.0128933
- 421 26. Jean-Daniel LP. Effects of Biomass Fuel on Child Acute Respiratory Infections in Rural Areas  
422 of Cameroon and Gabon. Univers J Public Heal. 2016;4: 121–132.  
423 doi:10.13189/ujph.2016.040301
- 424 27. Capuno JJ, Tan CAR, Javier X. Cooking and coughing: Estimating the effects of clean fuel for  
425 cooking on the respiratory health of children in the Philippines. Glob Public Health. 2018;13:  
426 20–34. doi:10.1080/17441692.2016.1202297
- 427 28. Azad KMAK. Risk Factors for Acute Respiratory Infections (ARI) Among Under-five  
428 Children in Bangladesh. J Sci Res. 2009;1: 72–81. doi:10.3329/jsr.v1i1.1055
- 429 29. Dahal GP, Johnson FA, Padmadas SS. Maternal smoking and acute respiratory infection  
430 symptoms among young children in nepal: Multilevel analysis. J Biosoc Sci. 2009;41: 747–  
431 761. doi:10.1017/S0021932009990113
- 432 30. Astale T, Chenault M. Help-seeking behavior for children with Acute respiratory infection in  
433 Ethiopia: Results from 2011 Ethiopia Demographic and Health Survey. PLoS One. 2015;10:  
434 1–10. doi:10.1371/journal.pone.0142553
- 435 31. Tekle AG, Worku A, Berhane Y. Factors associated with acute respiratory infection in  
436 children under the age of 5 years: evidence from the 2011 Ethiopia Demographic and Health

- 437 Survey. *Pediatr Heal Med Ther*. 2015; 9. doi:10.2147/phmt.s77915
- 438 32. Adesanya OA, Chiao C. A multilevel analysis of lifestyle variations in symptoms of acute  
439 respiratory infection among young children under five in Nigeria. *BMC Public Health*.  
440 2016;16: 880.
- 441 33. Pinzón-Rondón ÁM, Aguilera-Otalvaro P, Zárate-Ardila C, Hoyos-Martínez A. Acute  
442 respiratory infection in children from developing nations: a multi-level study. *Paediatr Int*  
443 *Child Health*. 2016;36: 84–90. doi:10.1179/2046905515Y.0000000021
- 444 34. Harerimana JM, Nyirazinyoye L, Thomson DR, Ntaganira J. Social, Economic and  
445 environmental risk factors for acute lower respiratory infections among children under  
446 fiveyears of age in Rwanda. *Arch Public Heal*. 2016;74: 1–7. doi:10.1186/s13690-016-0132-1
- 447 35. Jabessa S. Multilevel Analysis of Acute Respiratory Infection Symptoms among under Five  
448 Children in Ethiopia. *J Biom Biostat*. 2015;06. doi:10.4172/2155-6180.1000251
- 449 36. National Population Commission(NPC)[Nigeria] & ICF International. Nigeria Demographic  
450 and Health Survey, 2008. DHS Measure Macro, New York and Nigeria Population  
451 Commission, Abuja, Nigeria; 2009.
- 452 37. National Population Commission(NPC)[Nigeria] and ICF. 2019. Nigeria Demographic and  
453 Health Survey 2018. Abuja, Nigeria, And Rockville, Maryland, USA: NPC and ICF; 2019.
- 454 38. National Population Commission [Nigeria] and ICF International. Nigeria Demographic and  
455 Health Survey 2013. Abuja, Nigeria; 2014.
- 456 39. National Population Commission (NPC) [Nigeria] and ICF. Nigeria Demographic and Health  
457 Survey 2018. Abuja, Nigeria, and Rockville, Maryland, USA: NPC and ICF. 2019. Available:  
458 <https://www.dhsprogram.com/pubs/pdf/FR359/FR359.pdf>

- 459 40. National Population Commission (NPC) [Nigeria] and ICF. Nigeria Demographic and Health  
460 Survey 2013. Abuja, Nigeria, and Rockville, Maryland, USA: NPC and ICF International.  
461 2014; 143–157. doi:10.4324/9780429042669-8
- 462 41. National Population Commission (NPC) [Nigeria] and ICF. Nigeria Demographic and Health  
463 Survey 2008. Abuja, Nigeria: National Population Commission and ICF Macro. 2009; [19].  
464 Available: [http://measuredhs.com/publications/publication-sr171-summary-reports-key-](http://measuredhs.com/publications/publication-sr171-summary-reports-key-findings.cfm)  
465 [findings.cfm](http://measuredhs.com/publications/publication-sr171-summary-reports-key-findings.cfm)
- 466 42. Zhuang H, Zhang Y, Wang W, Ren Y, Liu F, Du J, et al. Optimized hot spot analysis for  
467 probability of species distribution under different spatial scales based on MaxEnt model:  
468 *Manglietia insignis* case. *Biodivers Sci.* 2018;26: 931–940. doi:10.17520/biods.2018059
- 469 43. Oloyede I, Ijezie E. Epidemiological and seasonal variations of pneumonia in children  
470 admitted in the University of Uyo Teaching Hospital, Uyo, Akwa Ibom State, Nigeria: A  
471 retrospective 5-year study (2013- 2017). *Niger J Paediatr.* 2020;47: 42–47.
- 472 44. McAllister DA, Liu L, Shi T, Chu Y, Reed C, Burrows J, et al. Global, regional, and national  
473 estimates of pneumonia morbidity and mortality in children younger than 5 years between  
474 2000 and 2015: a systematic analysis. *Lancet Glob Heal.* 2019;7: e47–e57.  
475 doi:10.1016/S2214-109X(18)30408-X
- 476 45. Federal Ministry of Health. National Pneumonia Control Strategy and Implementation Plan.  
477 Abuja Nigeria; 2019. Available: [https://stoppneumonia.org/wp-](https://stoppneumonia.org/wp-content/uploads/2020/02/National_Integrated_Pneumonia_Control_Strategy_Implementation_Plan.pdf)  
478 [content/uploads/2020/02/National\\_Integrated\\_Pneumonia\\_Control\\_Strategy\\_Implementation\\_](https://stoppneumonia.org/wp-content/uploads/2020/02/National_Integrated_Pneumonia_Control_Strategy_Implementation_Plan.pdf)  
479 [Plan.pdf](https://stoppneumonia.org/wp-content/uploads/2020/02/National_Integrated_Pneumonia_Control_Strategy_Implementation_Plan.pdf)
- 480 46. Falagas ME, Mourtzoukou EG, Vardakas KZ. Sex differences in the incidence and severity of

- 481 respiratory tract infections. *Respir Med.* 2007;101: 1845–1863.  
482 doi:10.1016/j.rmed.2007.04.011
- 483 47. Victora CG, Fuchs SC, Flores JAC, Fonseca W, Kirkwood B. Risk Factors of Pneumonia  
484 Among Children in a Brazilian Metropolitan Area. 2021;93.
- 485 48. Pradhan S, Rao A, Pattanshetty S, Nilima A. Knowledge and perception regarding childhood  
486 pneumonia among mothers of under-five children in rural areas of Udipi Taluk, Karnataka: A  
487 cross-sectional study. *Indian J Heal Sci.* 2016;9: 35. doi:10.4103/2349-5006.183690
- 488 49. Simiyu DE, Wafula EM, Nduati RW. Mothers’ knowledge, attitudes and practices regarding  
489 acute respiratory infections in children in Baringo District, Kenya. *East Afr Med J.* 2003;80:  
490 303–307. doi:10.4314/eamj.v80i6.8706
- 491 50. Rakić A. Water Quality Control in the Water Supply System for the Purpose of Preventing  
492 Legionnaires’ Disease. *Water Challenges an Urban World.* 2017.  
493 doi:10.5772/intechopen.74018
- 494 51. George CM, Brooks WA, Graziano JH, Nonyane BAS, Hossain L, Goswami D, et al. Arsenic  
495 exposure is associated with pediatric pneumonia in rural Bangladesh: a case control study.  
496 *Environ Heal.* 2015;14: 83. doi:10.1186/s12940-015-0069-9
- 497 52. Osuchukwu NC, Agba AMO, Emeh JU. Infectious Diseases and the Environment: Baseline  
498 Information From Stakeholders in Cross River State, Nigeria. *Int J Res -*  
499 *GRANTHAALAYAH.* 2017;5: 263–281. doi:10.29121/granthaalayah.v5.i1.2017.1889
- 500 53. Enebeli UU. The association between water, sanitation and hygiene practices and the  
501 occurrence of childhood diarrhoea in Abia state, Nigeria. *Int J Appl Res.* 2019;5: 104–109.
- 502 54. Akinyemi JO, Morakinyo OM. Household environment and symptoms of childhood acute

- 503 respiratory tract infections in Nigeria , 2003 – 2013 : a decade of progress and stagnation.  
504 2018; 1–12. Available: doi: 10.1186/s12879-018-3207-5
- 505 55. Zanzuzdana A, Khan M, Kraemer A. Housing Satisfaction Related to Health and Importance of  
506 Services in Urban Slums: Evidence from Dhaka, Bangladesh. Soc Indic Res. 2013;112: 163–  
507 185. doi:10.1007/s11205-012-0045-5
- 508 56. World Health Organization. World Health Statistics 2010 Indicator compendium Interim  
509 version. World Health. 2010; 236.
- 510 57. Prüss-Ustün A, Wolf J, Bartram J, Clasen T, Cumming O, Freeman MC, et al. Burden of  
511 disease from inadequate water, sanitation and hygiene for selected adverse health outcomes:  
512 An updated analysis with a focus on low- and middle-income countries. Int J Hyg Environ  
513 Health. 2019;222: 765–777. doi:10.1016/j.ijheh.2019.05.004
- 514 58. Kandala N-B, Ji C, Stallard N, Stranges S, Cappuccio FP. Spatial analysis of risk factors for  
515 childhood morbidity in Nigeria. Am J Trop Med Hyg. 2007;77: 770–779.
- 516 59. Adedini SA, Odimegwu C, Imasiku ENS, Ononokpono DN. Ethnic differentials in under-five  
517 mortality in Nigeria. Ethn Health. 2015;20: 145–162. doi:10.1080/13557858.2014.890599

518

## 519 **Supporting Information**

520 **S1 Table. Distribution of demographic characteristics for cough per year of survey**

521 **S2 Table. Distribution of demographic characteristics for fever per year of survey**

522 **S3 Table. Distribution of demographic characteristics for short rapid breaths per year of survey**

523 **S4 Table. Prevalence of cough by state and year of survey**

524 **S5 Table. Prevalence of fever by state and year of survey**

525 **S6 Table. Prevalence of short rapid breaths symptoms by state and year of survey**



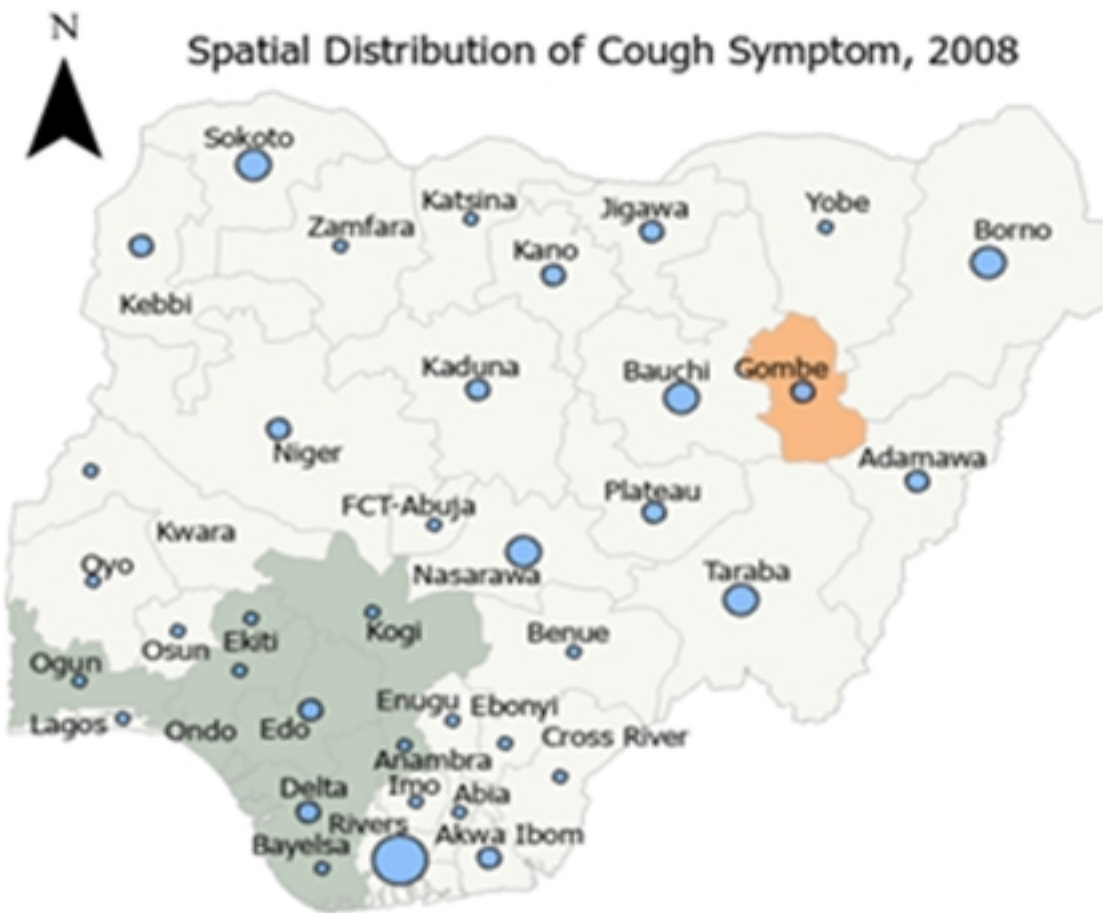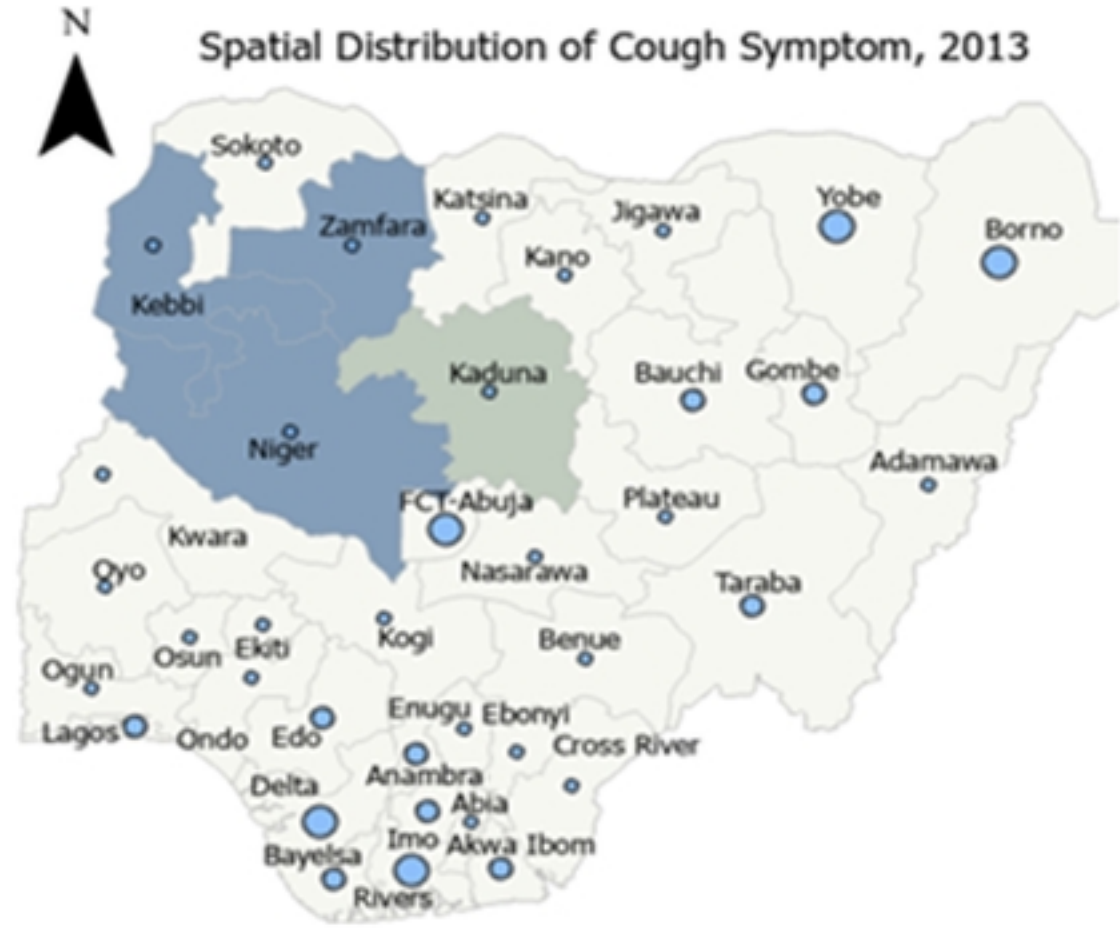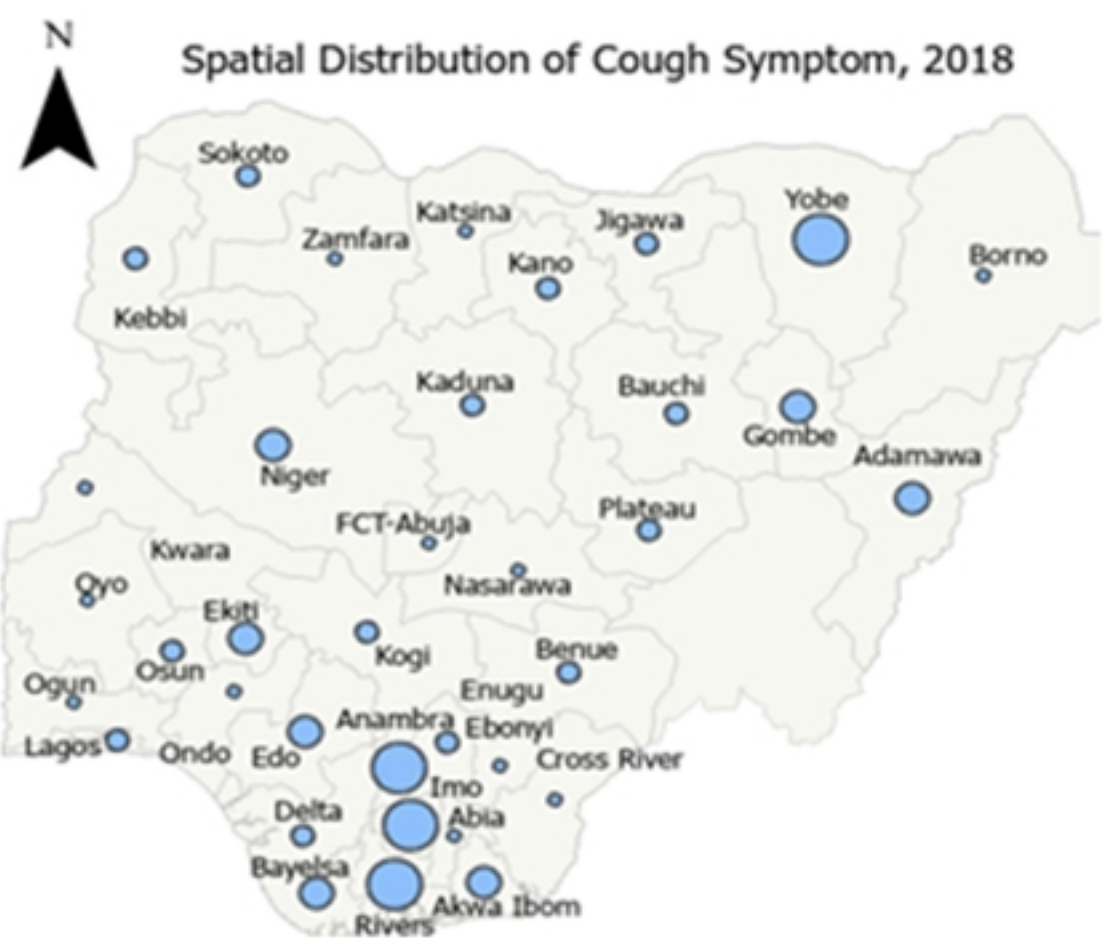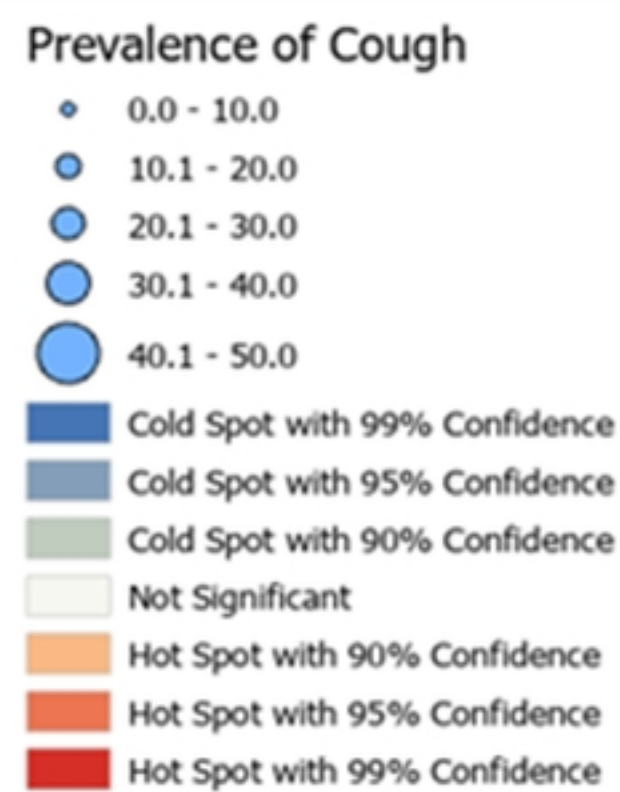

Figure

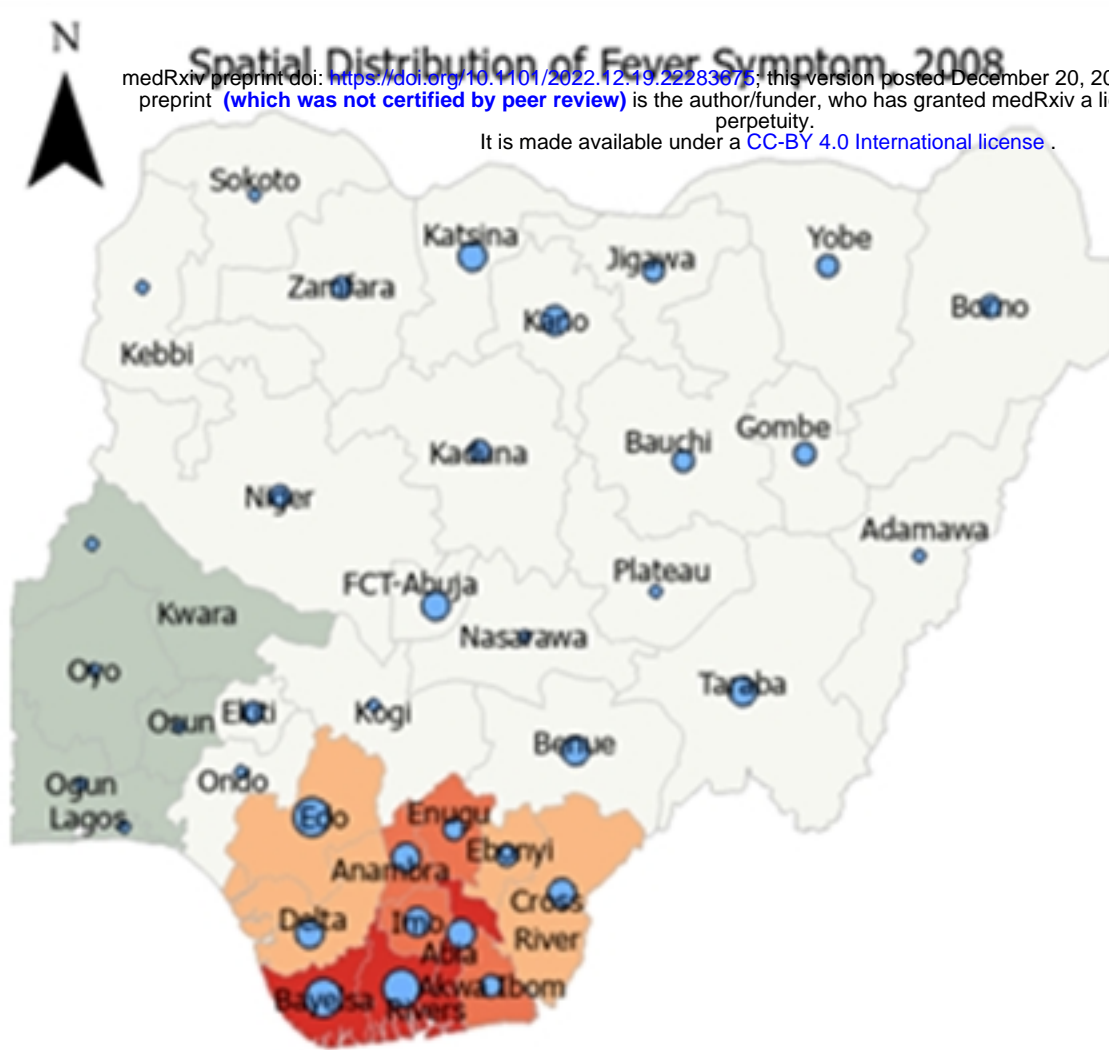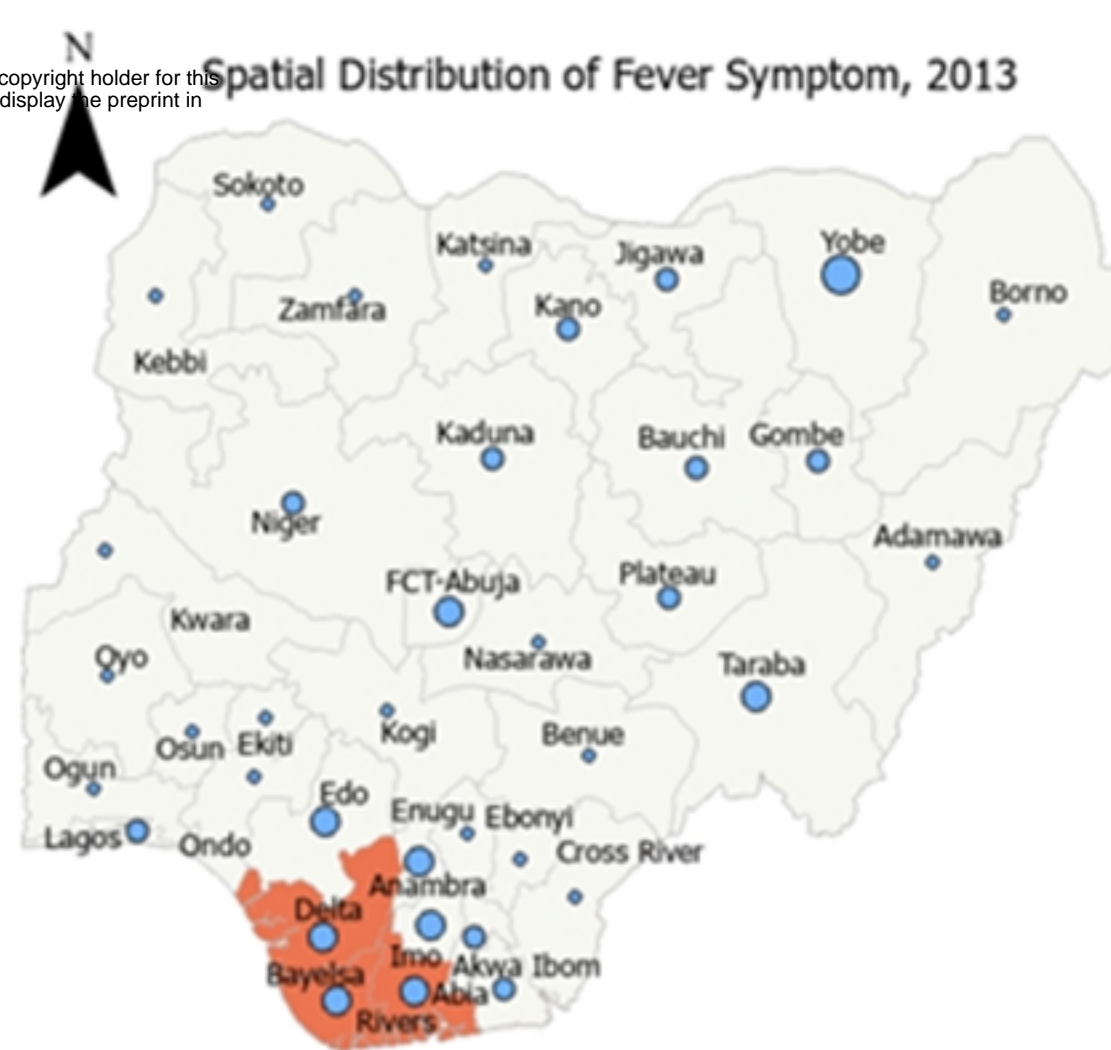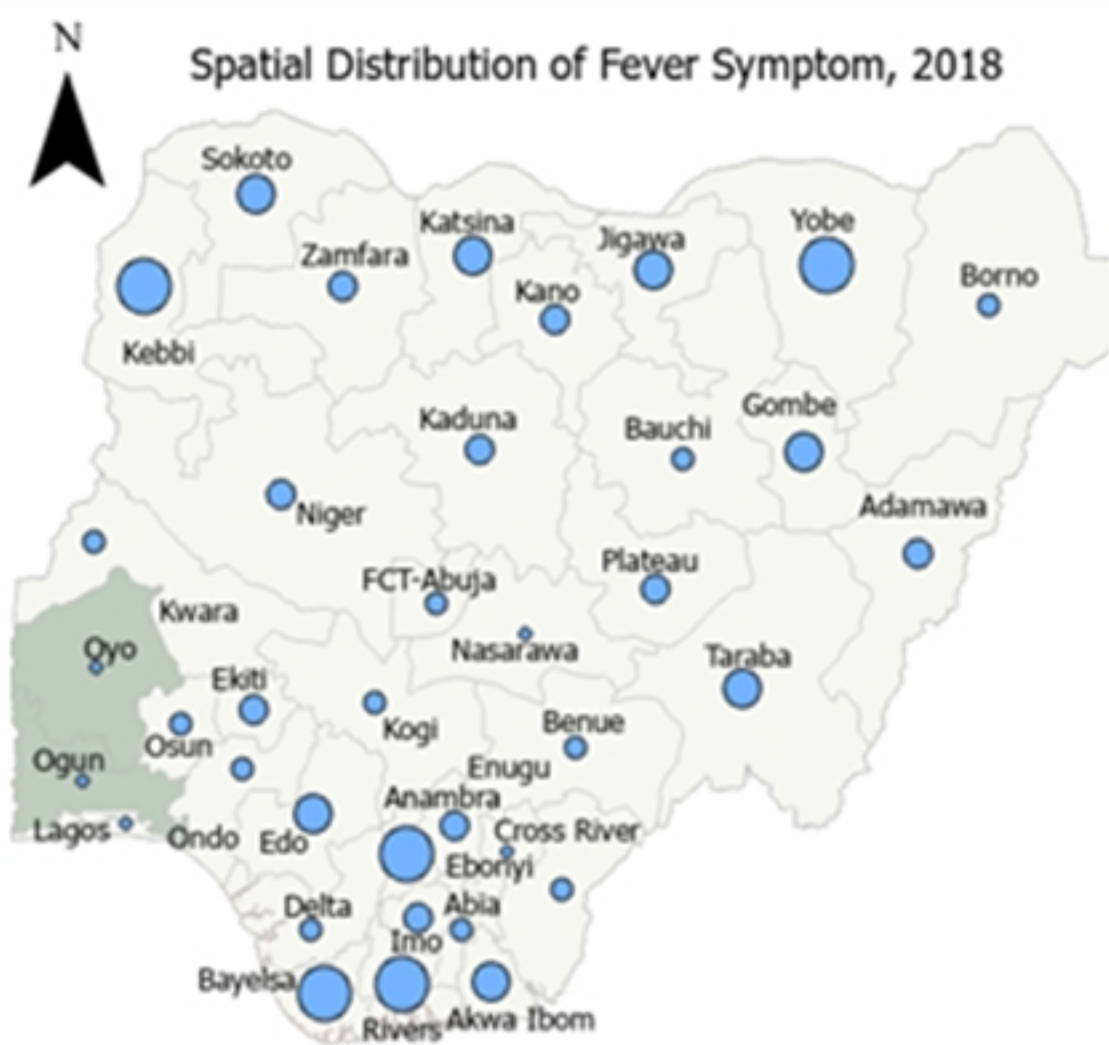

### Prevalence of Fever

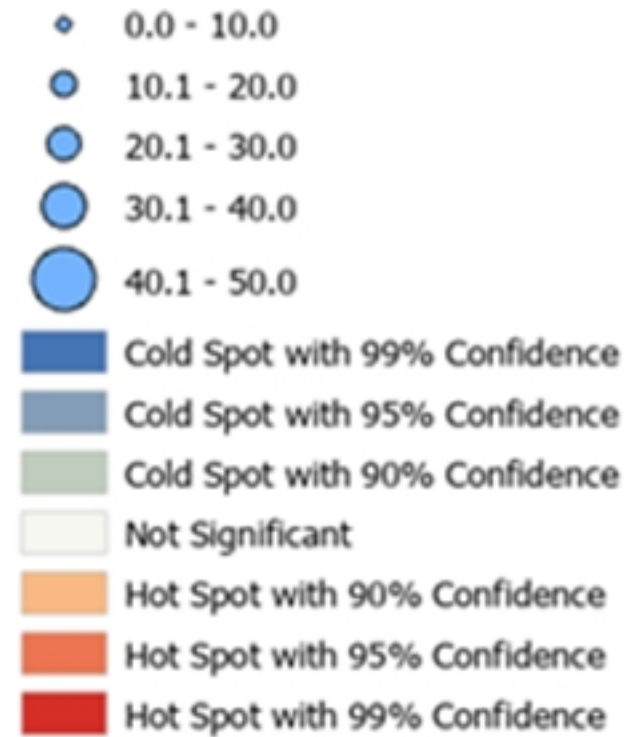



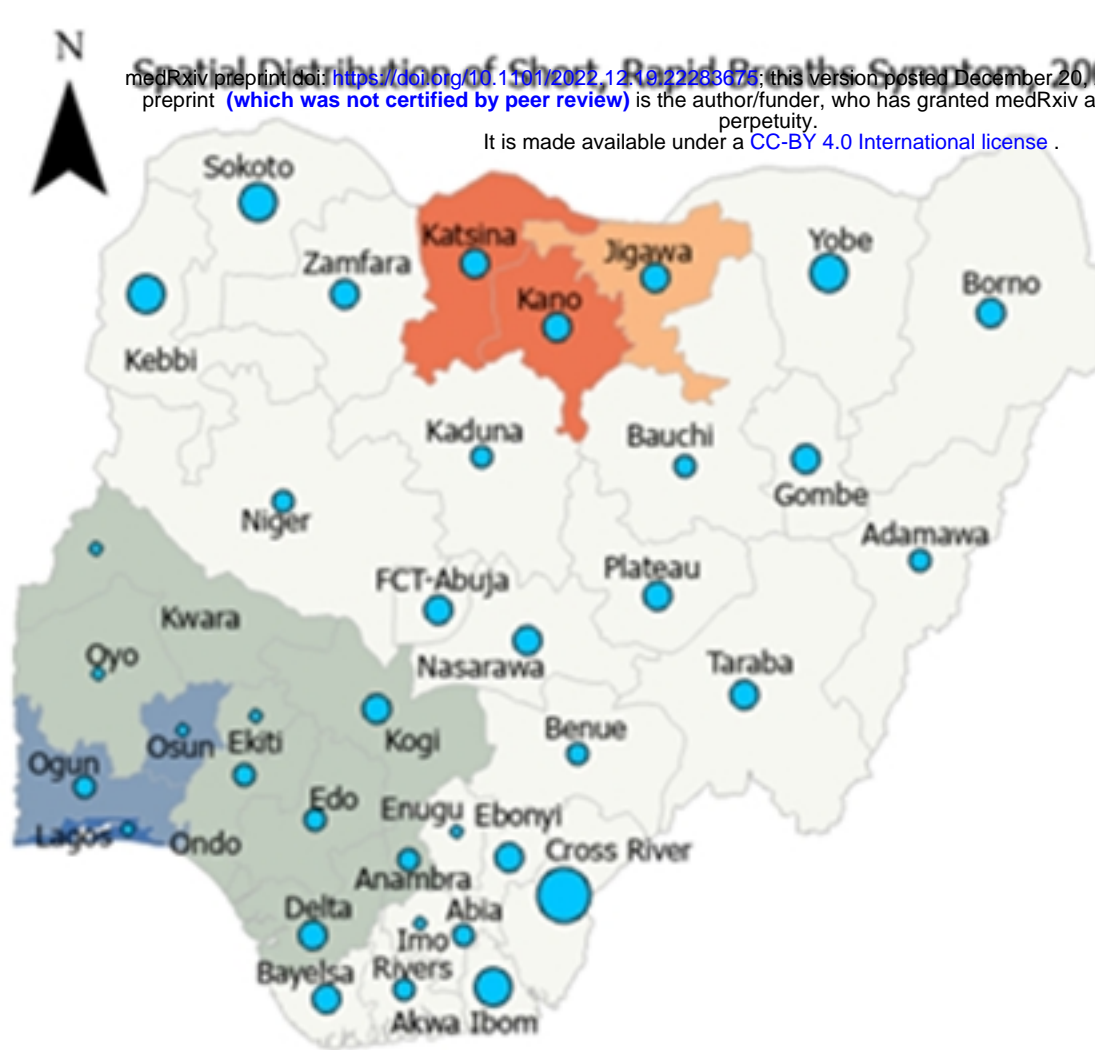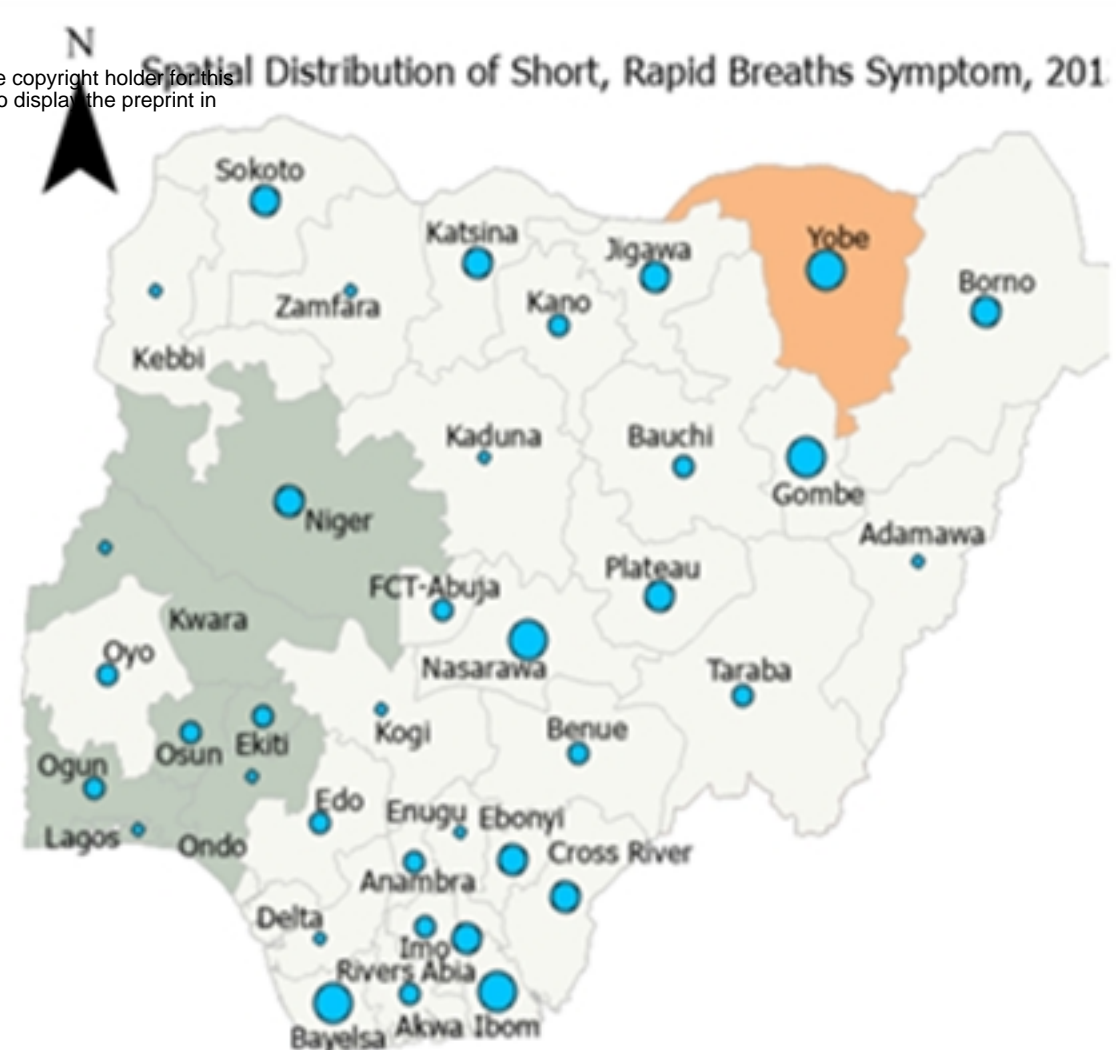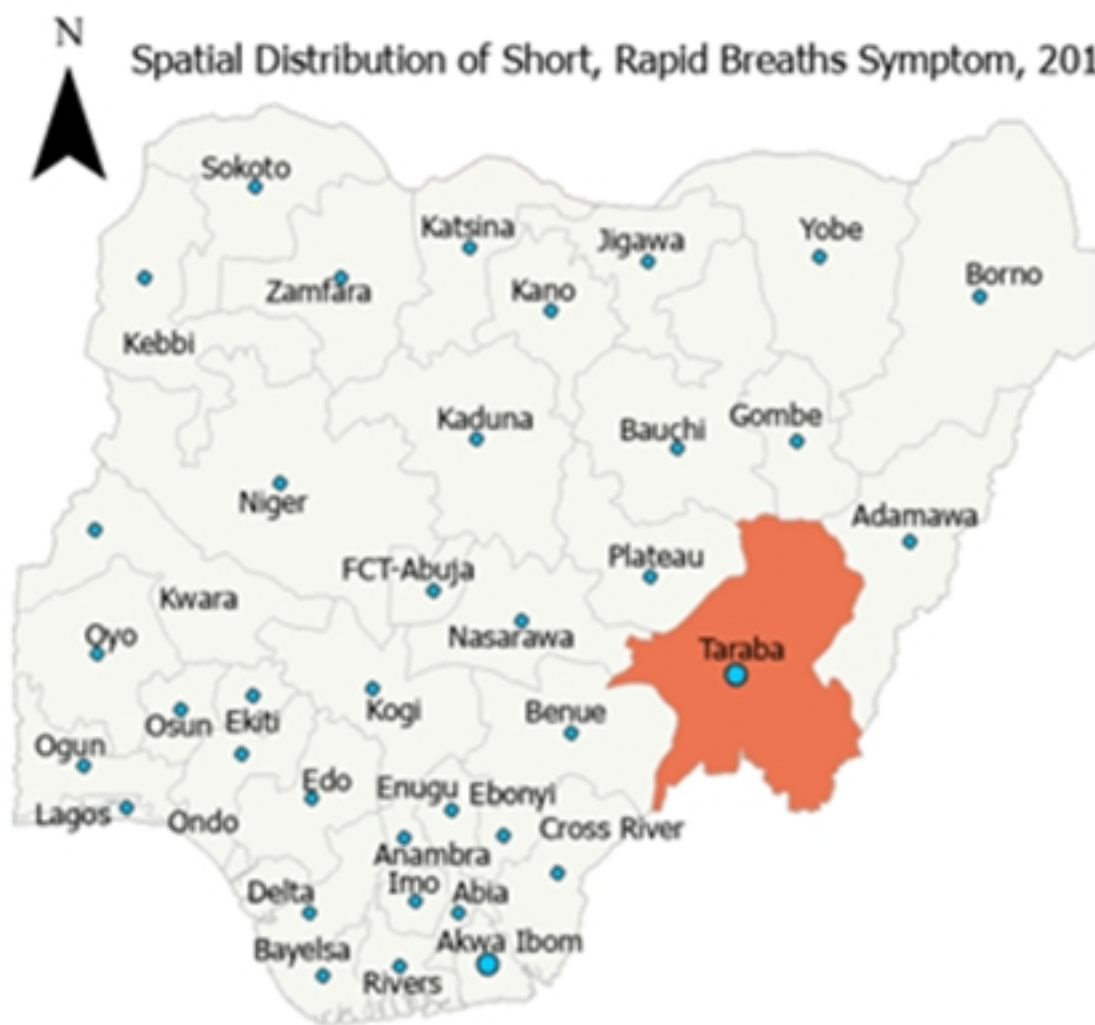

#### Prevalence of Short, Rapid Breaths

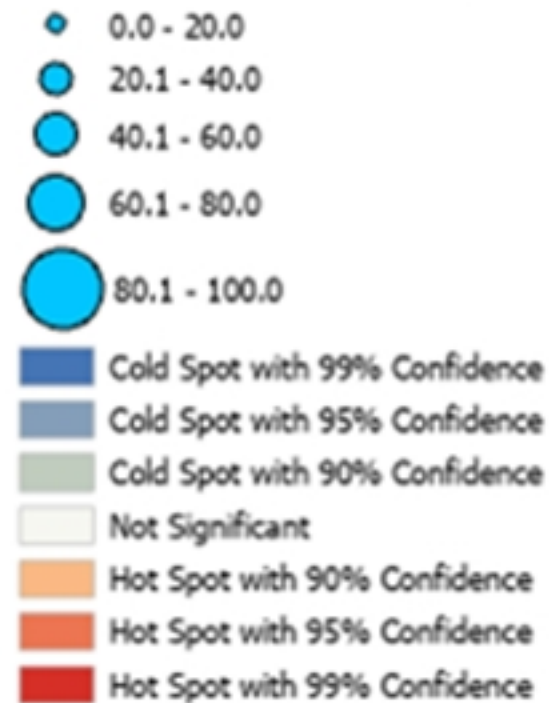

Figure
